# Supplementary material
Source: PubMed Central journal article supplement (PMC1599876)
Supplement: rspb20043041s12.pdf [file rspb20043041s12.pdf]

# ELECTRONIC APPENDIX

This is the Electronic Appendix to the article

## **Vibrational communication facilitates cooperative foraging in a phloem-feeding insect**

by

Reginald B. Cocroft

*Proc. R. Soc. B* ([doi:10.1098/rspb.2004.3041](https://doi.org/10.1098/rspb.2004.3041))

Electronic appendices are refereed with the text; however, no attempt is made to impose a uniform editorial style on the electronic appendices.

### **Movie 1**

Nymphs of the neotropical treehopper *Calloconophora pinguis* use vibrational signals to advertise feeding sites to siblings. In this movie an individual that has discovered a new site is joined by a sibling, and the two signal in synchrony to advertise the site to the rest of the group. The movie was made by R. Cocroft in the laboratory at the Smithsonian Tropical Research Institute in Gamboa, Panama.
